# Supplementary material for: Informing epidemic (research) responses in a timely fashion by knowledge management – a Zika virus use case
Source: PubMed Central journal article supplement (PMC7725600; doi:10.1242/bio.053934), 2020-12-02
Supplement: biolopen-9-053934-s1.pdf [file biolopen-9-053934-s1.pdf]

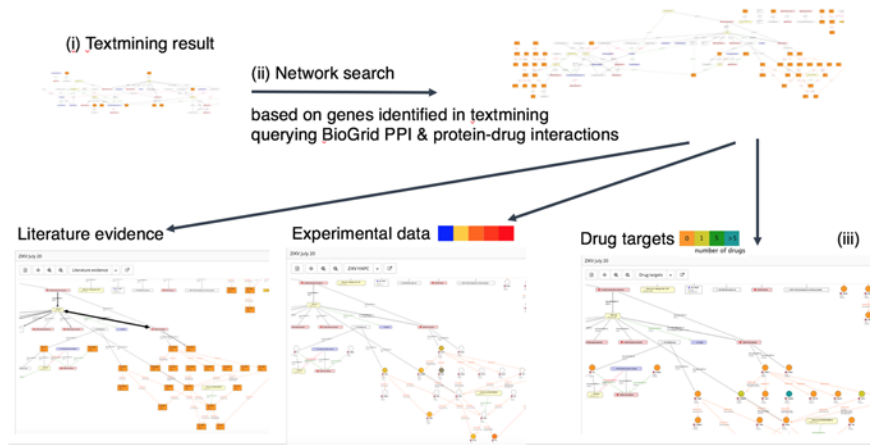

Figure S2
